# Supplementary material for: Li4SiO4 Doped-Li7P2S8I solid electrolytes with high lithium stability synthesised using liquid-phase shaking
Source: Royal Society of Chemistry journal article supplement (doi:10.1039/d1ra09348g), 2022-01-01
Supplement: d1ra09348g1.pdf [file d1ra09348g1.pdf]

## Supporting information

### **Li<sub>4</sub>SiO<sub>4</sub> Doped-Li<sub>7</sub>P<sub>2</sub>S<sub>8</sub>I solid electrolytes with high lithium stability synthesised using liquid-phase shaking**

Kazuhiro Hikima <sup>a</sup>, Ho Jie Ler <sup>a</sup>, Radian Febi Indrawan <sup>a</sup>, Hiroyuki Muto <sup>a,b</sup> and Atsunori Matsuda <sup>a,\*</sup>

<sup>a</sup>Department of Electrical and Electronic Information Engineering, Toyohashi University of Technology, 1-1 Hibarigaoka, Tempaku, Toyohashi, Aichi 441-8580, Japan, matsuda@ee.tut.ac.jp

<sup>b</sup>Institute of Liberal Arts and Sciences, Toyohashi University of Technology, 1-1 Hibarigaoka, Tempaku, Toyohashi, Aichi 441-8580, Japan.

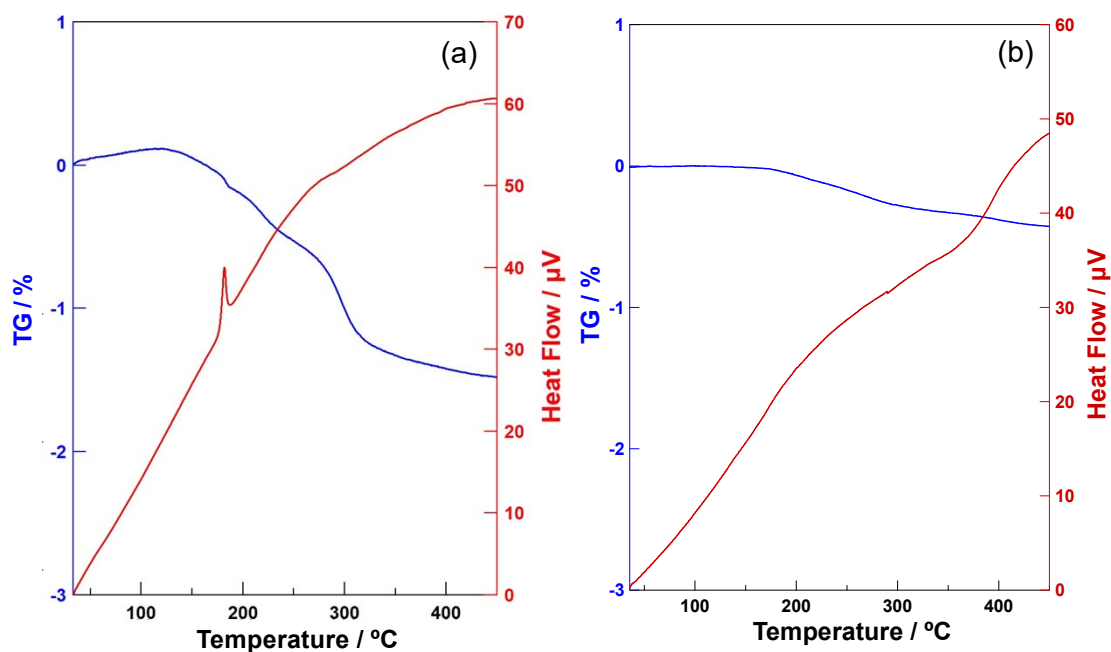

**Figure S1.** TG-DTA curves of the  $\text{Li}_7\text{P}_2\text{S}_8\text{I} \cdot 10\text{Li}_4\text{SiO}_4$  solid electrolytes synthesized by the mechanical milling methods (a) before, (b) after the heat treatment at  $150\text{ }^\circ\text{C}$  2

h.

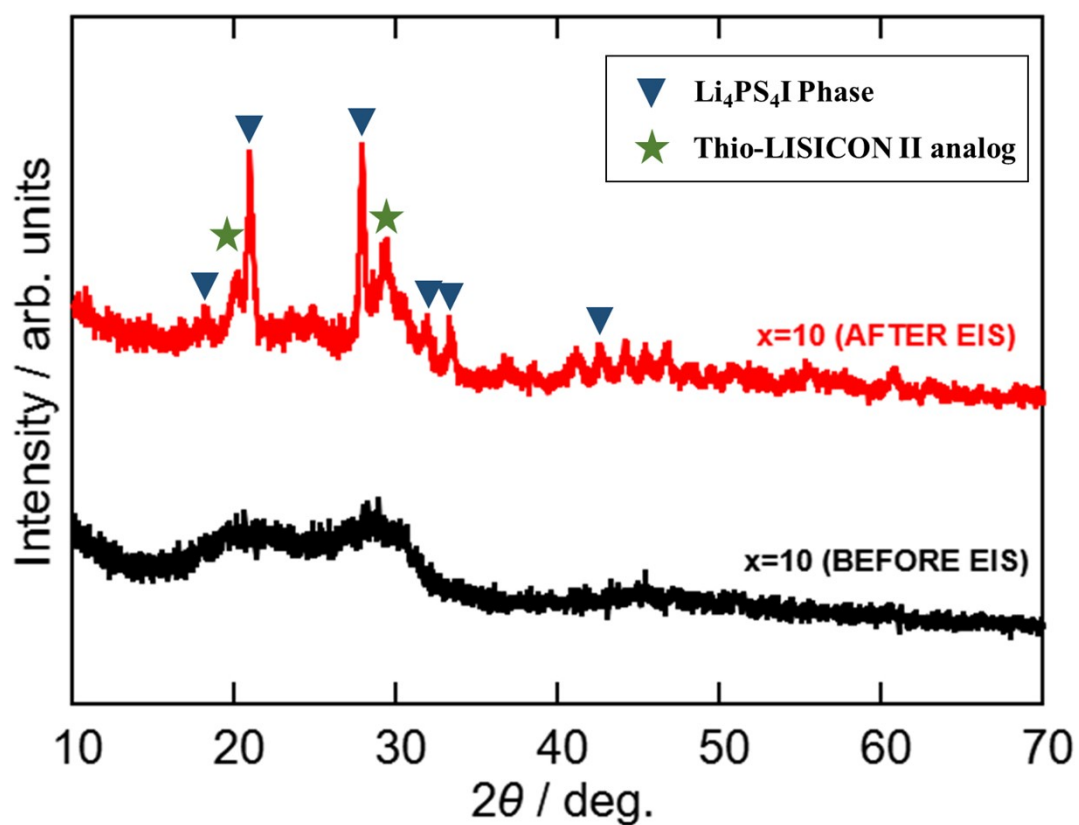

**Figure S2.** X-ray diffraction patterns of the  $\text{Li}_7\text{P}_2\text{S}_8\text{I} \cdot 10\text{Li}_4\text{SiO}_4$  solid electrolytes synthesized by the mechanical milling method before and after the EIS measurement.

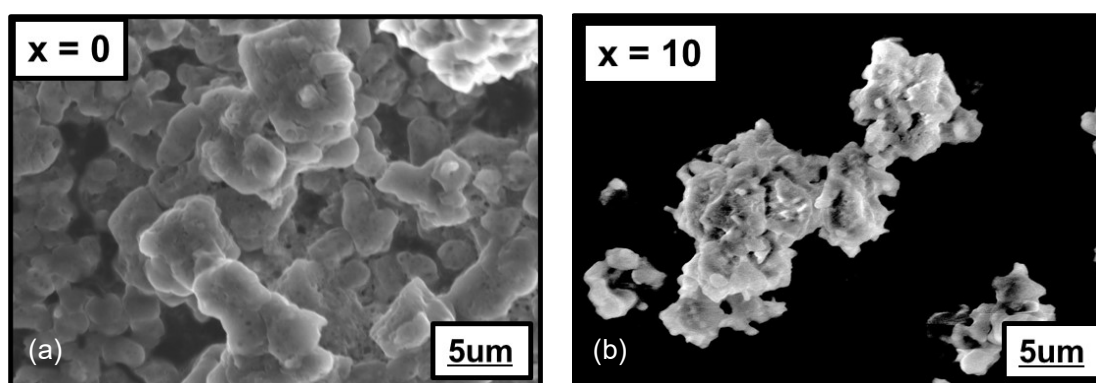

**Figure S3.** (a) SEM images of the  $\text{Li}_7\text{P}_2\text{S}_8\text{I} \cdot x\text{Li}_4\text{SiO}_4$  ((a)  $x=0$ , (b)  $x=10$ ) solid electrolytes synthesized by liquid phase shaking method.
